# Supplementary material for: Sources of volatile organic compounds and policy implications for regional ozone pollution control in an urban location of Nanjing, East China
Source: Copernicus journal article supplement (doi:10.5194/acp-2019-817), 2019-10-25
Supplement: Supplementary file 1 [file acp-2019-817-supplement.pdf]

1  
2  
3  
4  
5  
6  
7  
8  
9  
10  
11  
12

**Supplement of**

**Sources of volatile organic compounds and policy implications for regional ozone pollution control in an urban location of Nanjing, East China.**

**Qiuyue Zhao et al.**

*Correspondence to:* Jun Bi (jbi@nju.edu.cn) and Qian Liu (candyvz@msn.com)

13

14

**Table S1.** Annual average concentrations of total volatile organic compounds and four hydrocarbon classes (ppbv) for several urban sites worldwide.

| Location                      | Study period    | TVOCs | Alkanes | Aromatics | Alkenes | Acetylene | Reference            |
|-------------------------------|-----------------|-------|---------|-----------|---------|-----------|----------------------|
| Nanjing, China                | 2016.1-2016.12  | 25.7  | 13.6    | 4.4       | 3.2     | 4.5       | This study           |
| Nanjing, China <sup>1</sup>   | 2011.3-2012.2   | 43.5  | 19.6    | 9.7       | 11.0    | 3.2       | An et al., 2014      |
| Shanghai, China <sup>1</sup>  | 2009.1-2010.12  | 27.8  | 12.8    | 8.7       | 3.6     | 2.6       | Wang et al., 2013    |
| Tianjin, China <sup>2</sup>   | 2014.11-2015.10 | 28.7  | 18.3    | 5.3       | 5.2     | -         | Liu et al., 2016     |
| Guangzhou, China <sup>3</sup> | 2011.6-2012.5   | 42.7  | 25.2    | 10.3      | 7.2     | -         | Zou et al., 2015     |
| Wuhan, China <sup>4</sup>     | 2013.2-2014.10  | 24.3  | -       | -         | -       | -         | Lyu et al., 2016     |
| Beijing, China <sup>5</sup>   | 2014.4-2015.1   | 35.2  | 16.5    | 5.8       | 9.3     | 3.6       | Zhang et al., 2017   |
| Nagoya, Japan <sup>2</sup>    | 2003.12-2004.12 | 28.6  | 16.5    | 5.4       | 4.9     | 1.9       | Saito et al., 2009   |
| Seoul, Korea <sup>3</sup>     | 1998.8-1999.7   | 53.0  | 28.2    | 11.8      | 9.6     | 3.4       | Na and Kim, 2001     |
| London, UK <sup>4</sup>       | 1996.1-1996.12  | 30.5  | 15.3    | 5.0       | 5.6     | 4.6       | Derwent et al., 2000 |
| Lille, France <sup>5</sup>    | 1999.7-2000.6   | 22.0  | 11.5    | 4.7       | 4.3     | 1.5       | Borbon et al., 2002  |
| Dallas, USA <sup>6</sup>      | 1996.1-2004.12  | 41.5  | 29.3    | 7.1       | 3.8     | 1.3       | Qin et al., 2007     |

15

16

17

18

19

20

21

22

23

24

25

26

27

28

29

30

31

32

33

34

Note: 1. PAMS 56 measured using a GC-FID (AMA Instruments, Germany) at an industrial area; 2. C2-C12 VOCs using GC-FID (Chromate-sud airmoVOC) and two columns for C2-C6 and C6-C12 separately; 3. PAMS 56 species analyzed by using GC-FID (AMA instruments GmbH, Germany); 4. PAMS 56 by using a GC-FID (AMA, Germany) with two columns for C2-C6 and C6-C12 separately; 5. Fifty-six NMHC analyzed by GC-FID-MS (TH\_PKU-300); 6, fifty-nine NMHC using the Airmo online analyzer (Chromatotes, France); 7. 48 non-methane hydrocarbons analyzed using GC-FID (Shimadzu, CO.) with a methyl silicone fused silica column; 8. C2-C9 VOCs sampled using SUMMA canisters and analyzed using GC-FID for C2-C3 species and GC-MS for C4-C9 species; 9. Twenty-six C2-C8 hydrocarbons using Chrompack VOCAIR system; 10. Thirty-seven C2-C9 NMHC using Perkin-Elmer GC-FID system; 11. Forty-five C2-C10 NMHC measured using the Perkin-Elmer ozone precursor system (GC-FID)

35 **Table S2. Policy measures for the control of VOCs in Jiangsu and their implementation date.**

| Sector                                                                                                                                                                                                              | Measures                                                                                                                                                                               | Date                                                                                                                                          |
|---------------------------------------------------------------------------------------------------------------------------------------------------------------------------------------------------------------------|----------------------------------------------------------------------------------------------------------------------------------------------------------------------------------------|-----------------------------------------------------------------------------------------------------------------------------------------------|
| Comprehensive                                                                                                                                                                                                       | Advice on Promoting Air Pollution Joint Prevention and Control Work to Improve Regional Air Quality (Office of the State Council [2010] No. 33)                                        | 2010                                                                                                                                          |
|                                                                                                                                                                                                                     | Guidance on the Prevention and Control of Volatile Organic Compounds Pollution (Provincial Office of the Joint Conference on the prevention and control of air pollution [2012] No. 2) | 2012                                                                                                                                          |
|                                                                                                                                                                                                                     | Guidelines for the Implementation of Leak Detection and Repair (LDAR) in Jiangsu Province (Trial) (Provincial Office of Environmental Protection [2013] No. 318)                       | 2013                                                                                                                                          |
|                                                                                                                                                                                                                     | Implementation Plan for Air Pollution Prevention Action Plan in Jiangsu Province (Jiangsu Provincial Government [2014] No. 1)                                                          | 2014                                                                                                                                          |
|                                                                                                                                                                                                                     | Outline of the 13 <sup>th</sup> Five-Year Plan for National Ecological Protection (Environmental Ecology [2016] No. 151)                                                               | 2016                                                                                                                                          |
|                                                                                                                                                                                                                     | Notice on Organizing and Conducting VOC Emission Inventory and Source Apportion Work (Provincial Office of Environmental Protection [2013] No. 231)                                    | 2017                                                                                                                                          |
|                                                                                                                                                                                                                     | Implementation Plan for Clean Production and Transformation of Key Industries in Jiangsu Province (Provincial Office of Economic and Information Commission [2014] No. 733)            | 2014                                                                                                                                          |
| Key Industries                                                                                                                                                                                                      | Guidelines for Control of Volatile Organic Compounds Pollution in Key Industries in Jiangsu Province (Provincial Office of Environmental Protection [2014] No. 128)                    | 2014                                                                                                                                          |
|                                                                                                                                                                                                                     | Plan for Remediation of Volatile Organic Compounds in Key Industries in Jiangsu Province (Provincial Office of Environmental Protection [2015] No. 19)                                 | 2015                                                                                                                                          |
|                                                                                                                                                                                                                     | Interim Measures for Calculation of Volatile Organic Compounds Emissions in Key Industries in Jiangsu Province                                                                         | 2016                                                                                                                                          |
|                                                                                                                                                                                                                     | Regulations on Prevention and Control of Vehicle Exhaust Pollution in Nanjing                                                                                                          | 2017                                                                                                                                          |
| Motor Vehicles                                                                                                                                                                                                      | Regulations on Prevention and Control of Vehicle Exhaust Pollution in Jiangsu Province                                                                                                 | 2018                                                                                                                                          |
|                                                                                                                                                                                                                     | Chemical Industry                                                                                                                                                                      | Investigation on VOC Pollution and Remediation Pilot Work in Chemical Industry (Provincial Office of Environmental Protection [2012] No. 183) |
| Technical Specifications for Prevention and Control of Air Pollution in Chemical Industries in Jiangsu Province (Provincial Office of Environmental Protection [2014] No. 3)                                        |                                                                                                                                                                                        | 2014                                                                                                                                          |
| Notification on carrying out the technical demonstration and pilot work of leak detection and repair (LDAR) in petrochemical and chemical industries (Provincial Office of Environmental Protection [2015] No. 157) |                                                                                                                                                                                        | 2015                                                                                                                                          |
| Technical Guidance for Control of Unorganized emissions in Chemical Industries in Jiangsu Province (Provincial Office of Environmental Protection [2016] No. 95)                                                    |                                                                                                                                                                                        | 2016                                                                                                                                          |

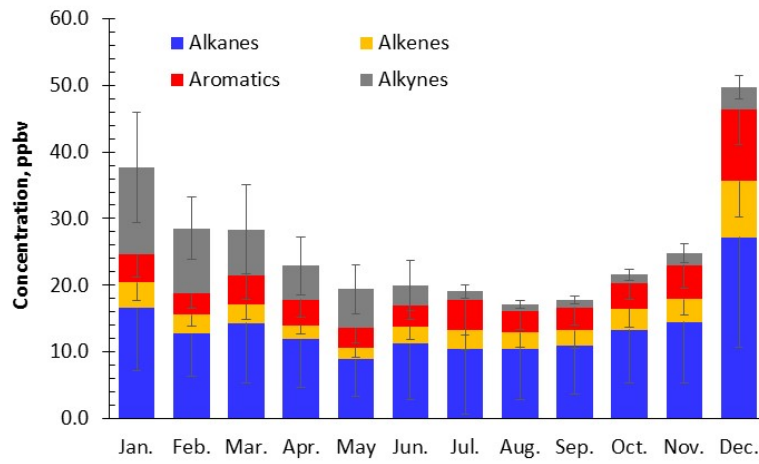

Figure S1 Monthly variations of different VOCs groups at JAES site

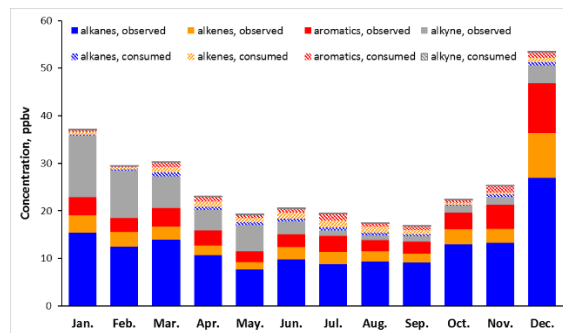

Figure S2 Monthly variations of the estimated initial VOCs summarized from the measured concentration and estimated consumed fractions.

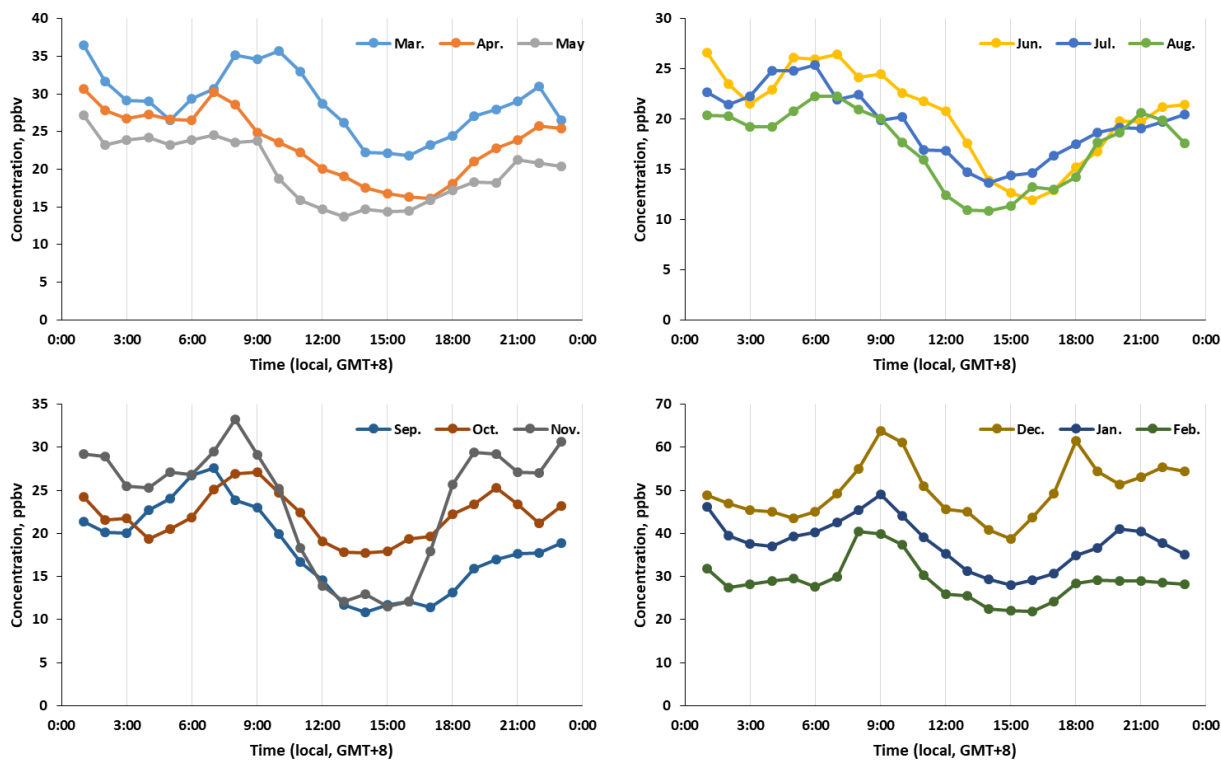

Figure S3 Diurnal variations of ambient VOCs in different months at JAES site
